# Supplementary material
Source: PubMed Central journal article supplement (PMC4037322)
Supplement: supp_jeb.101725_JEB101725.pdf [file supp_jeb.101725_JEB101725.pdf]

**Table S1.** Summary statistics

## A. Development time

| Factor                   | Coefficient | Coefficient standard error | z*     | p        |
|--------------------------|-------------|----------------------------|--------|----------|
| Dietary yeast            | -0.4835     | 0.1394                     | -3.47  | 0.00052  |
| Dietary glucose          | -1.9789     | 0.1619                     | -12.22 | <0.00001 |
| Microbiota               | 0.4900      | 1.1782                     | 0.42   | 0.68     |
| Yeast*glucose            | 0.2304      | 0.0241                     | 9.55   | <0.00001 |
| Yeast * Microbiota       | -0.2117     | 0.1827                     | -1.16  | 0.25     |
| Glucose * microbiota     | 0.5866      | 0.1969                     | 2.98   | 0.0029   |
| Yeast*glucose*microbiota | -0.0652     | 0.0303                     | -2.15  | 0.031    |

## B. Body mass, nutritional indices and food uptake

| Factor               | Body weight                  |                              | protein                   |                            | Triglyceride <sup>1</sup>   |                             | glycogen                   |                            | trehalose                   |                            | glucose                    |                            | Food uptake <sup>2</sup>     |                             |
|----------------------|------------------------------|------------------------------|---------------------------|----------------------------|-----------------------------|-----------------------------|----------------------------|----------------------------|-----------------------------|----------------------------|----------------------------|----------------------------|------------------------------|-----------------------------|
|                      | male                         | female                       | male                      | female                     | male                        | female                      | male                       | female                     | male                        | female                     | male                       | female                     | male                         | female                      |
| Microbiota           | F <sub>1,138</sub> = 1.07    | F <sub>1,138</sub> = 13.8*** | F <sub>1,137</sub> = 0.81 | F <sub>1,138</sub> = 4.17* | F <sub>1,137</sub> = 241*** | F <sub>1,138</sub> = 139*** | F <sub>1,135</sub> = 28*** | F <sub>1,138</sub> = 34*** | F <sub>1,135</sub> = 22***  | F <sub>1,138</sub> = 38*** | F <sub>1,118</sub> = 94*** | F <sub>1,120</sub> = 66*** | F <sub>1,416</sub> = 180***  | F <sub>1,394</sub> = 97***  |
| Dietary glucose      | F <sub>1,138</sub> = 0.19    | F <sub>1,138</sub> = 11.8*** | F <sub>1,137</sub> = 0.10 | F <sub>1,138</sub> = 0.96  | F <sub>1,137</sub> = 98***  | F <sub>1,138</sub> = 90***  | F <sub>1,135</sub> = 15*** | F <sub>1,138</sub> = 20*** | F <sub>1,135</sub> = 15***  | F <sub>1,138</sub> = 16*** | F <sub>1,118</sub> = 44*** | F <sub>1,120</sub> = 41*** | F <sub>1,416</sub> = 295***  | F <sub>1,394</sub> = 56***  |
| Dietary yeast        | F <sub>1,138</sub> = 13.0*** | F <sub>1,138</sub> = 50.8*** | F <sub>1,137</sub> = 0.54 | F <sub>1,138</sub> = 10.7* | F <sub>1,137</sub> = 19***  | F <sub>1,138</sub> = 9.3**  | F <sub>1,135</sub> = 0.14  | F <sub>1,138</sub> = 40*** | F <sub>1,136</sub> = 0.24   | F <sub>1,138</sub> = 26*** | F <sub>1,118</sub> = 1.16  | F <sub>1,120</sub> = 16*** | F <sub>1,416</sub> = 64***   | F <sub>1,394</sub> = 414*** |
| Microbiota x glucose | F <sub>1,138</sub> = 16.0*** | F <sub>1,138</sub> = 50.8*** | F <sub>1,137</sub> = 4.3* | F <sub>1,138</sub> = 2.05  | F <sub>1,137</sub> = 0.06   | F <sub>1,138</sub> = 9.6**  | F <sub>1,135</sub> = 1.83  | F <sub>1,138</sub> = 7.1** | F <sub>1,135</sub> = 9.53** | F <sub>1,138</sub> = 5.8*  | F <sub>1,118</sub> = 2.1   | F <sub>1,120</sub> = 1.5   | F <sub>1,416</sub> = 13.5*** | F <sub>1,394</sub> = 3.3    |
| Microbiota x yeast   | F <sub>1,138</sub> = 8.6**   | F <sub>1,138</sub> = 19.1*** | F <sub>1,137</sub> = 0.37 | F <sub>1,138</sub> = 1.27  | F <sub>1,137</sub> = 0.89   | F <sub>1,138</sub> = 0.12   | F <sub>1,135</sub> = 0.59  | F <sub>1,138</sub> = 3.0   | F <sub>1,135</sub> = 0.42   | F <sub>1,138</sub> = 0.01  | F <sub>1,118</sub> = 0.12  | F <sub>1,120</sub> = 13*** | F <sub>1,416</sub> = 0.41    | F <sub>1,394</sub> = 8.3**  |
| Glucose x yeast      | F <sub>1,138</sub> = 0.11    | F <sub>1,138</sub> = 0.14    | F <sub>1,137</sub> =      | F <sub>1,138</sub> = 1.33  | F <sub>1,137</sub> = 8.0**  | F <sub>1,138</sub> = 1.02   | F <sub>1,135</sub> = 12*** | F <sub>1,138</sub> =       | F <sub>1,135</sub> =        | F <sub>1,138</sub> = 0.03  | F <sub>1,118</sub> = 2.4   | F <sub>1,120</sub> = 0.38  | F <sub>1,416</sub> = 108***  | F <sub>1,394</sub> = 22***  |

|                                    |                    |                    |                    |                    |                    |                     |                    |                   |                    |                    |                   |                     |                        |                   |
|------------------------------------|--------------------|--------------------|--------------------|--------------------|--------------------|---------------------|--------------------|-------------------|--------------------|--------------------|-------------------|---------------------|------------------------|-------------------|
|                                    |                    |                    | 0.08               |                    |                    |                     |                    | 0.003             | 7.77**             |                    |                   |                     |                        |                   |
| Microbiota<br>x glucose<br>x yeast | $F_{1,138} = 0.04$ | $F_{1,138} = 0.39$ | $F_{1,137} = 0.06$ | $F_{1,138} = 1.89$ | $F_{1,137} = 2.93$ | $F_{1,137} = 5.4^*$ | $F_{1,135} = 0.64$ | $F_{1,138} = 3.8$ | $F_{1,135} = 1.51$ | $F_{1,138} = 1.59$ | $F_{1,118} = 2.0$ | $F_{1,120} = 6.8^*$ | $F_{1,416} = 8.7^{**}$ | $F_{1,394} = 1.1$ |

<sup>1</sup> Following square-root transformation; <sup>2</sup> Following logarithmic transformation
